# Supplementary material for: Assuring access to topical mosquito repellents within an intensive distribution scheme: a case study in a remote province of Cambodia
Source: Springer Nature journal article supplement (doi:10.1186/s12936-015-0960-4), 2015-11-24
Supplement: MOESM1 [file 9761786]

# Additional file 1

## Distribution of repellent bottles and recovery of empty bottles

Village: \_\_\_\_\_ Commune: \_\_\_\_\_ Family code: | | | | | / | | | | |

| No.   | Family member code | Recovery empty bottles |                                 |                       |                                    | IDnew bottle | Date<br>dd/mm/yy |
|-------|--------------------|------------------------|---------------------------------|-----------------------|------------------------------------|--------------|------------------|
|       |                    | IDbottle               | Amount still in the bottle (ml) | Reported side effects | If repellent is not used, ask why? |              |                  |
| 1     |                    |                        |                                 |                       |                                    |              | /       /        |
| 2     |                    |                        |                                 |                       |                                    |              | /       /        |
| 3     |                    |                        |                                 |                       |                                    |              | /       /        |
| 4     |                    |                        |                                 |                       |                                    |              | /       /        |
| 5     |                    |                        |                                 |                       |                                    |              | /       /        |
| 6     |                    |                        |                                 |                       |                                    |              | /       /        |
| 7     |                    |                        |                                 |                       |                                    |              | /       /        |
| 8     |                    |                        |                                 |                       |                                    |              | /       /        |
| 9     |                    |                        |                                 |                       |                                    |              | /       /        |
| 10    |                    |                        |                                 |                       |                                    |              | /       /        |
| Total |                    |                        |                                 |                       |                                    |              |                  |

Signature/finger print of family representative

Signature/finger print of distributor
