# Supplementary material for: Assuring access to topical mosquito repellents within an intensive distribution scheme: a case study in a remote province of Cambodia
Source: Springer Nature journal article supplement (doi:10.1186/s12936-015-0960-4), 2015-11-24
Supplement: MOESM4 [file 9761786]

**Additional file 4: Characteristics of families included in the Household Survey**

| <b>Study families, N=2303</b>                                                          |                                                                          | <b>n</b> | <b>%</b> |
|----------------------------------------------------------------------------------------|--------------------------------------------------------------------------|----------|----------|
| <b>Ethnic groups:</b>                                                                  | - Jarai                                                                  | 585      | 25.4     |
|                                                                                        | - Tompuon                                                                | 569      | 24.7     |
|                                                                                        | - Kreung                                                                 | 565      | 24.5     |
|                                                                                        | - Others                                                                 | 584      | 25.4     |
| <b>Living duration in village:</b>                                                     | - ≤7 months                                                              | 9        | 0.4      |
|                                                                                        | - >7 months                                                              | 2292     | 99.5     |
|                                                                                        | - Don't know                                                             | 2        | 0.1      |
| <b>Family size:</b>                                                                    | Median=5, Q1=3, Q3=6                                                     |          |          |
| <b>Number of under 5 children:</b>                                                     | Median=1, Q1=0, Q3=1                                                     |          |          |
| <b>Number of houses:</b>                                                               | Median=2, Q1=1, Q2=2                                                     |          |          |
| <b>Main house characteristics:(Among families that had houses, N=2246)</b>             |                                                                          |          |          |
| House type:                                                                            | - On pillar                                                              | 2042     | 90.9     |
|                                                                                        | - On ground                                                              | 204      | 9.1      |
| Wall type:                                                                             | - Wood                                                                   | 1767     | 78.7     |
|                                                                                        | - Bamboo                                                                 | 141      | 18.4     |
| Roof type:                                                                             | - Iron sheet                                                             | 1869     | 83.2     |
|                                                                                        | - Thatch                                                                 | 178      | 7.9      |
| Wall complete:                                                                         | - Yes                                                                    | 1900     | 84.6     |
| Roof complete:                                                                         | - Yes                                                                    | 2156     | 96.0     |
| House condition:                                                                       | - Good                                                                   | 1348     | 60.0     |
|                                                                                        | - Medium                                                                 | 794      | 35.4     |
|                                                                                        | - Old & about to collapse                                                | 104      | 4.6      |
| House size:                                                                            | - ≤ 20 m <sup>2</sup>                                                    | 669      | 29.8     |
|                                                                                        | - 21-50 m <sup>2</sup>                                                   | 1149     | 51.2     |
|                                                                                        | - ≥51 m <sup>2</sup>                                                     | 428      | 19.1     |
| <b>Number of families per house:</b>                                                   | (Among those having houses, N=2243, missing=3)<br>(Median=2, Q1=1, Q3=2) |          |          |
| <b>Family head occupation:</b>                                                         | - Farmer                                                                 | 2121     | 92.1     |
| <b>Transportation:</b> (some families might own more than one item, N=2302, missing=1) | - Motorbike                                                              | 1738     | 75.5     |
|                                                                                        | - Bicycle                                                                | 394      | 17.1     |
|                                                                                        | - None                                                                   | 458      | 19.9     |
| <b>Agriculture equipment:</b><br>(Some families might own more than one item)          | - Grass cutter                                                           | 801      | 34.8     |
|                                                                                        | - Grass sprayer                                                          | 321      | 13.9     |
|                                                                                        | - Rice or bean mill                                                      | 193      | 8.4      |
|                                                                                        | - None                                                                   | 1326     | 57.6     |
| <b>Size of used farm land (Ha):</b>                                                    | Median=1, Q1=0.5, Q3=2 (N=2292, missing=11)                              |          |          |
| <b>Size of used rice field (Ha):</b>                                                   | Median=0, Q1=0, Q3=1 (N=2299, missing=4)                                 |          |          |
| <b>Size of cashew farm (Ha):</b>                                                       | Median=0, Q1=0, Q3=1 (N=2299, missing=4)                                 |          |          |
| <b>Number of cows:</b>                                                                 | Median=0, Q1=0, Q3=1                                                     |          |          |
| <b>Number of buffaloes:</b>                                                            | Median=0, Q1=0, Q3=1                                                     |          |          |
| <b>Number of pigs:</b>                                                                 | Median=1, Q1=0, Q3=2                                                     |          |          |
| <b>Number of chickens:</b>                                                             | Median=2, Q1=0, Q3=5                                                     |          |          |
| <b>Communication material:</b>                                                         | - Mobile phone                                                           | 1587     | 68.9     |
| <b>Entertainment material:</b><br>(Some families might own more than one item)         | - Radio                                                                  | 809      | 35.1     |
|                                                                                        | - Television                                                             | 468      | 20.3     |
|                                                                                        | - DVD player                                                             | 392      | 17.0     |
|                                                                                        | - Laptop DVD player                                                      | 278      | 12.1     |
|                                                                                        | - DTV antenna                                                            | 49       | 2.1      |
|                                                                                        | - None                                                                   | 466      | 20.2     |
| <b>Lighting material:</b>                                                              | - Battery lamp                                                           | 1389     | 60.3     |
| <b>Power sources:</b> (Some families might own more than one item)                     | - Battery                                                                | 731      | 31.7     |
|                                                                                        | - Generator                                                              | 370      | 16.1     |
