# Supplementary material for: Assuring access to topical mosquito repellents within an intensive distribution scheme: a case study in a remote province of Cambodia
Source: Springer Nature journal article supplement (doi:10.1186/s12936-015-0960-4), 2015-11-24
Supplement: MOESM6 [file 9761786]

**Additional file 5: Univariate analysis of potential determinants of contact**

| Variables                                              | 2012                   |                | 2013                   |                |
|--------------------------------------------------------|------------------------|----------------|------------------------|----------------|
|                                                        | <i>Xi</i> <sup>2</sup> | <i>P-value</i> | <i>Xi</i> <sup>2</sup> | <i>P-value</i> |
| Socio-economic status                                  | 3.61                   | 0.4613         | 3.59                   | 0.4645         |
| District                                               | 26.42                  | <b>0.0004</b>  | 4.34                   | 0.7395         |
| Commune                                                | 49.32                  | <b>0.0017</b>  | 26.81                  | 0.3135         |
| User's family head occupation                          | 1.82                   | 0.1775         | 2.6                    | 0.107          |
| Travel duration to distributor's house in rainy season | 3.3588                 | 0.3395         | 3.8592                 | 0.2771         |
| How to get repellent                                   | 0.3307                 | 0.8476         | 3.0326                 | 0.2195         |
| Distributor job                                        | 4.22                   | 0.3765         | 2.33                   | 0.6745         |
| Transport type owned by distributor                    | 12.14                  | 0.0589         | 5.38                   | 0.4965         |
| Distributor age                                        | 2.21                   | 0.331          | 1.03                   | 0.598          |
| Knowing distributor                                    | 10.595                 | <b>0.0011</b>  | 11.269                 | <b>0.0008</b>  |
