# Supplementary material for: Assuring access to topical mosquito repellents within an intensive distribution scheme: a case study in a remote province of Cambodia
Source: Springer Nature journal article supplement (doi:10.1186/s12936-015-0960-4), 2015-11-24
Supplement: MOESM7 [file 9761786]

**Additional file 6: Univariate analysis of potential determinants of consumption**

| Variable                            | 2012 |         | 2013  |               |
|-------------------------------------|------|---------|-------|---------------|
|                                     | LRT  | P-value | LRT   | P-value       |
| Socio-economic status               | 0    | 1       | 0     | 1             |
| District                            | 0    | 1       | 14.34 | <b>0.0454</b> |
| Commune                             | 0.02 | 1       | 32.35 | 0.1184        |
| User's family head occupation       | 2.07 | 0.9556  | 17.13 | <b>0.0166</b> |
| Used farm land size                 | 0    | 0.9813  | 0     | 0.9542        |
| Used rice field size                | 0    | 0.9821  | 0.03  | 0.8631        |
| How to get repellent                | 0    | 0.9997  | 0     | 0.9992        |
| Distributor age                     | 0    | 0.9999  | 3.21  | 0.2005        |
| Transport type owned by distributor | 0.71 | 0.9943  | 11.85 | 0.0654        |
| Knowing distributor                 | 0    | 0.9993  | 0.48  | 0.4871        |
